# Supplementary material for: Association between Daily Activities and Behavioral and Psychological Symptoms of Dementia in Community-Dwelling Older Adults with Memory Complaints by Their Families
Source: PubMed Central journal article supplement (PMC7558144; doi:10.3390/ijerph17186831), 2020-09-18
Supplement: ijerph-17-06831-s001.pdf [file ijerph-17-06831-s001.pdf]

Table S1.Shopping in PADA-D

| Score | Process                 | actions that make up the process                                                                                                   | check             |                | Remarks |
|-------|-------------------------|------------------------------------------------------------------------------------------------------------------------------------|-------------------|----------------|---------|
|       | 1.Enter the store       | (1) Enter the store<br>(2)Take a shopping basket / cart<br>(3)Confirm the section                                                  | YES<br>YES<br>YES | NO<br>NO<br>NO |         |
|       | 2. Go to the section    | (1)Go toward the section<br>(2)Walk without hitting people or product shelves<br>(3)Get to the section                             | YES<br>YES<br>YES | NO<br>NO<br>NO |         |
|       | 3.Find a product        | (1)Find the target product<br>(2)Check the price and expiration date<br>(3)Put the required quantity of the products in the basket | YES<br>YES<br>YES | NO<br>NO<br>NO |         |
|       | 4.Pay for the product   | (1)Stand in line at the cash register<br>(2)Understand and pay the total amount<br>(3)Check the change                             | YES<br>YES<br>YES | NO<br>NO<br>NO |         |
|       | 5.Take home the product | (1)Pick up the product<br>(2)Put the product into a shopping bag<br>(3)Go toward the exit                                          | YES<br>YES<br>YES | NO<br>NO<br>NO |         |

Table S2 .Cooking in PADA-D

| Score | Process                                                    | actions that make up the process                                                                                                                  | check |    | Remarks |
|-------|------------------------------------------------------------|---------------------------------------------------------------------------------------------------------------------------------------------------|-------|----|---------|
|       | 1.Plan a meal                                              | (1)Search for and understand the steps for cooking<br>(2)Prepare the ingredients<br>(3)Prepare the cooking utensils                               | YES   | NO |         |
|       | 2.Prepare the food<br>(wash, cut and cook the ingredients) | (1)Wash the foodstuffs<br>(2)Slice/cut /mash the foodstuffs<br>(3)Fry/ steam/ boil /bake the foodstuffs                                           | YES   | NO |         |
|       | 3.Season the ingredients<br>(choose seasoning, et al)      | (1)Choose appropriate seasoning<br>(2)Add a suitable amount of seasoning<br>(3)Check the taste                                                    | YES   | NO |         |
|       | 4.Plate the food                                           | (1)Select the appropriate dishes for the food<br>(2)Prepare dishes for the number of people<br>(3)Serve the proper quantity of meal on the dishes | YES   | NO |         |
|       | 5.Set the table                                            | (1)Carry dishes to the table<br>(2)Set dishes on the table<br>(3)Set chopsticks / spoons and fork or knife                                        | YES   | NO |         |

Table S3. Housekeeping in PADA-D

| Score | Process                       | actions that make up the process                                                                                                        | check |    | Remarks |
|-------|-------------------------------|-----------------------------------------------------------------------------------------------------------------------------------------|-------|----|---------|
|       | 1. Clean up after a meal      | (1)Wash the dishes and cooking utensils<br>(2)Dry the dishes<br>(3)Put the dishes back where they belong                                | YES   | NO |         |
|       | 2. Managing daily necessities | (1)Understand about the contents of the refrigerator<br>(2)Sort out the mail and the bills<br>(3)Change clothes according to the season | YES   | NO |         |
|       | 3. Management of bedding      | (1)Make the bed<br>(2)Change the bedspread regularly<br>(3)Dry the bedding in a dryer                                                   | YES   | NO |         |
|       | 4. Clean the house            | (1)vacuum and sweep the room<br>(2)Wipe and scrub the room<br>(3)Tidy up the room / put something back                                  | YES   | NO |         |
|       | 5. Garbage dumping            | (1)Separate the garbage<br>(2)Put out the garbage on collection day<br>(3)Take the garbage to the dumpster                              | YES   | NO |         |

Table S4. Use modes of transportation in PADA-D

| Score | Process                                        | actions that make up the process                                                                                                                                                           | check |    | Remarks |
|-------|------------------------------------------------|--------------------------------------------------------------------------------------------------------------------------------------------------------------------------------------------|-------|----|---------|
|       | 1. Take a taxi                                 | (1)Call or catch a taxi<br>(2)Tell the driver the destination<br>(3)Get out at the destination                                                                                             | YES   | NO |         |
|       | 2.Take a bus or train                          | (1)Go to the station / bus stop<br>(2)Take a train or bus to the destination<br>(3)Get off at the station / bus stop                                                                       | YES   | NO |         |
|       | 3. Ride a bicycle                              | (1)Riding a bicycle<br>(2)Obey traffic rules<br>(3)Arrive at the destination and park the bike in a parking lot                                                                            | YES   | NO |         |
|       | 4. Drive a mobility scooter                    | (1)Drive a mobility scooter<br>(2)Obey traffic rules<br>(3)arrive at the destination and park the mobility scooter in a parking lot                                                        | YES   | NO |         |
|       | 5.Choose an appropriate mode of transportation | (1)Understand the time /distance to the destination<br>(2)Understand the fare for the chosen mode of transportation<br>(3)Use different modes of transportation depending on the situation | YES   | NO |         |

Table S5. Laundry in PADA-D

| Score | Process                                                                | actions that make up the process                                                                                                              | check             |                | Remarks |
|-------|------------------------------------------------------------------------|-----------------------------------------------------------------------------------------------------------------------------------------------|-------------------|----------------|---------|
|       | 1. Put the laundry in the washing machine                              | (1)Separate the laundry<br>(2)Open the lid of the washing machine<br>(3)Put the laundry into the washing machine                              | YES<br>YES<br>YES | NO<br>NO<br>NO |         |
|       | 2.Start the washing machine                                            | (1)Put some detergent in the washing machine<br>(2)Close the lid of the washing machine<br>(3)Turn on the power and start the washing machine | YES<br>YES<br>YES | NO<br>NO<br>NO |         |
|       | 3.Operate the dryer or find another effective means to dry the laundry | (1)Take the laundry out of the washing machine<br>(2)Stretch the wrinkle on the laundry<br>(3)Hang the laundry / put the laundry in the dryer | YES<br>YES<br>YES | NO<br>NO<br>NO |         |
|       | 4. Take in and fold the laundry                                        | (1)Check whether the laundry is dry or damp<br>(2)Take in the laundry<br>(3)Fold the laundry according to the shape of clothes                | YES<br>YES<br>YES | NO<br>NO<br>NO |         |
|       | 5.Put the clothes in the chest/closet                                  | (1)Carry the clothes to the chest/closet<br>(2)Put the clothes in appropriate storage<br>(3)Close drawers and closet door                     | YES<br>YES<br>YES | NO<br>NO<br>NO |         |

Table S6. Managing finances in PADA-D

| Score | Process                            | actions that make up the process                                                                                                                                                                                                                                | check             |                | Remarks |
|-------|------------------------------------|-----------------------------------------------------------------------------------------------------------------------------------------------------------------------------------------------------------------------------------------------------------------|-------------------|----------------|---------|
|       | 1.Handle cash                      | (1)Take out the required number of coins<br>(2)Take out the required number of bills<br>(3)Get the correct amount of change                                                                                                                                     | YES<br>YES<br>YES | NO<br>NO<br>NO |         |
|       | 2.Use cash on a daily life         | (1)Mainly handle cash for purchasing of grocery<br>(2)Handle cash for rent and bill payments<br>(3)Handle cash for special events                                                                                                                               | YES<br>YES<br>YES | NO<br>NO<br>NO |         |
|       | 3.Understand household express     | (1)Understand the necessary amount for living expenses<br>(2)Understand the amount of savings<br>(3)Understand assets                                                                                                                                           | YES<br>YES<br>YES | NO<br>NO<br>NO |         |
|       | 4.Use the bank and the post office | (1)Understand where the seals / passbooks / cards have been stored<br>(2)Understand the procedures for transactions at the bank counter (for withdrawals, deposits, bank transfers/payment)<br>(3)Use the ATM for withdrawals/deposits/ bank transfers/payments | YES<br>YES<br>YES | NO<br>NO<br>NO |         |
|       | 5.Use electronic money             | (1)Tap card against the card reader<br>(2) Transfer some cash to the card<br>(3)Understand the balance on the card.                                                                                                                                             | YES<br>YES<br>YES | NO<br>NO<br>NO |         |

Table S7. Managing medication in PADA-D

| Score | Process                                  | actions that make up the process                                                                                                                                                                                                  | check             |                | Remarks |
|-------|------------------------------------------|-----------------------------------------------------------------------------------------------------------------------------------------------------------------------------------------------------------------------------------|-------------------|----------------|---------|
|       | 1.Keep the regular time to take medicate | (1)Understand the regular time during the day to take medication<br>(2)Understand the regular time during the day to take medication when outside the home<br>(3)Understand the way of taking the time to remember own medication | YES<br>YES<br>YES | NO<br>NO<br>NO |         |
|       | 2.Take out the prescribed medicine       | (1)Understand the place to store the medicine<br>(2)Take out the storage case for regular medicine<br>(3)Open the storage case for regular medicine                                                                               | YES<br>YES<br>YES | NO<br>NO<br>NO |         |
|       | 3.Check the correct quantity of medicine | (1)Understand the shape of the medicine<br>(2)Understand the color of the medicine<br>(3)Understand the dosage of medicine                                                                                                        | YES<br>YES<br>YES | NO<br>NO<br>NO |         |
|       | 4.Take medicine correctly                | (1)Take the medicine with water<br>(2)Place a medical patch on the affected part<br>(3)Put ointment on the affected part                                                                                                          | YES<br>YES<br>YES | NO<br>NO<br>NO |         |
|       | 5.Keep track of leftover medicine        | (1)Understand what medicine to take at the next time<br>(2)Understand the shortage /surplus of medicine<br>(3)Self-handling of medicine shortage and surplus                                                                      | YES<br>YES<br>YES | NO<br>NO<br>NO |         |
